# Supplementary material
Source: PubMed Central journal article supplement (PMC423211)

**SUPPLEMENT B. Phylogeny of Protein Kinases from Arabidopsis and Rice, excluding RLK/Pelle members**

The kinase domain protein sequences were aligned for generating the neighbor-joining tree shown. The Arabidopsis gene names follow those of Arabidopsis Genome Initiative and MADD8. The rice gene names follow the convention: subspices abbreviation, scaffold number (as released by Beijing Genome Institute), and the gene number of the scaffold (as predicted in this study). These kinases were classified based on the phylogeny shown and two bootstrapped trees for Arabidopsis and rice kinases, respectively. The species-specific trees are generated with various kinase family representatives from human, worm, and yeast, where detailed delineation of kinase families were done. The classification for these kinases are shown on the right.

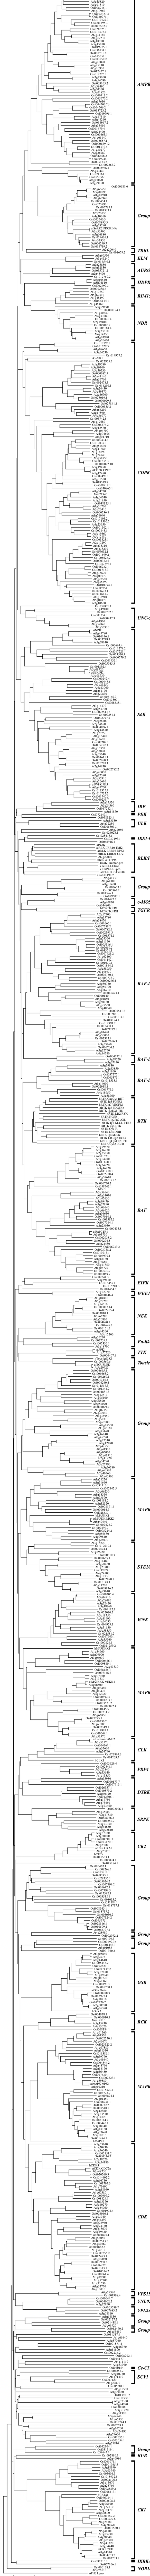

Supplement: plntcell_16_5_1220__1.pdf [file plntcell_16_5_1220__1.pdf]
